# Supplementary material for: Cytoplasmic-Nuclear Trafficking of G1/S Cell Cycle Molecules and Adult Human β-Cell Replication: A Revised Model of Human β-Cell G1/S Control
Source: PubMed Central journal article supplement — Diabetes. 2013 Jun 14;62(7):2460–70. doi: 10.2337/db12-0778 (PMC3712040; doi:10.2337/db12-0778), 2013-06-14
Supplement: supp_db12-0778_DB120778SupplementaryData1.pdf [file supp_db12-0778_DB120778SupplementaryData1.pdf]

## SUPPLEMENTARY DATA

**Supplementary Movie 1.** Cdk6-GFP live-cell imaging in INS1 cells. Rat insulinoma cell line (INS1) were plated and transduced with adenovirus encoding human cdk6 fused with green fluorescent protein (GFP) (Ad.cdk6-GFP) as described in Materials and Methods and were imaged 24 hr after transduction. See text for details.

**Supplementary Movie 2.** Cdk6-GFP live-cell imaging in human islet cells. Human islets were dispersed and transduced with Ad.cdk6-GFP as described in Materials and Methods and were imaged 24 hr after transduction. See text for details.
